# Supplementary material for: Determination of total organic carbon on hybrid organic-inorganic mesoporous silica by FT-NIR spectroscopy
Source: Royal Society of Chemistry journal article supplement (doi:10.1039/c6ra01293k), 2016-01-01
Supplement: c6ra01293k1.pdf [file c6ra01293k1.pdf]

# **Determination of Total Organic Carbon on Hybrid Organic-Inorganic Mesoporous Silica by FT-NIR spectroscopy**

**Manuela Oliverio,<sup>\*[a]</sup> Sonia Bonacci,<sup>[a]</sup> Monica Nardi,<sup>[b]</sup> Antonio Procopio<sup>[a]</sup>**

## **Supplementary Information**

## Table of Contents

|                                               |          |
|-----------------------------------------------|----------|
| <b>Experimental</b>                           | <b>3</b> |
| <b>Synthesis of the MCM-41 hybrid samples</b> | <b>4</b> |
| <b>TOC accuracy</b>                           | <b>6</b> |
| <b>Calibration set table</b>                  | <b>7</b> |
| <b>Validation set table</b>                   | <b>9</b> |

## Experimental

TOC measurements were carried out using an Analytic Jena multi N/C 2100 analyzer equipped with a HT 1300 oven. NIR measurements were performed in the reflectance mode using the Antaris II FT-NIR spectrophotometer (Thermo Scientific, Madison, WI, USA) equipped with an integrating sphere module. Each spectrum was the average of 64 scans, resolution was 4 cm<sup>-1</sup> e transmission 0.5mm. The software used to collect the spectra and data processing was Thermo Scientific TQ Analyst (Thermo Scientific, Madison, WI, USA).

The MW reactions were performed into the microwave reactor Synthos 3000 by Anton Paar, equipped with a rotor 64MG5 and a IR sensor as temperature external control working in P-controlled mode; a conversion factor of 1.214 was applied to calculate the value of internal temperature. Reactions were performed in 0.3-3 ml glass vials closed with a PTFE seal and a screw-cup in PEEK. Reaction was controlled by TLC using silica plates 60-F264 on alumina, commercially available from Merck. TLC were performed using silica plates 60-F264 on alumina, commercially available from Merck. All solvents were distilled before using by standard methods. All chemicals were used as commercially available.

## Synthesis of the MCM-41 hybrid samples

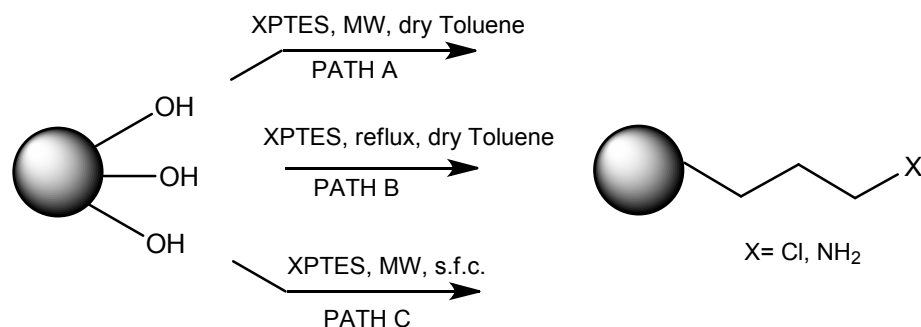

**Scheme 1:** General pathway of MCM-41 functionalization by a MW-assisted-Toluene method (Path A), a classical method (Path B) and a MW-assisted-s.f.c. method (Path C) at different times.

### *Pre-treatment of MCM-41 silica*

1 g of MCM-41 was treated with 25 ml of an aqueous solution of HCl 5, 15 or 25% v/v for 3 hours at reflux temperature. The temperature was lowered until room temperature and the mixture was filtered. Solid was washed with water and dried overnight at 100°C.

### *Functionalization MW-assisted of MCM-41 with solvent (Path A, CS01-04, CS06-09, CS13-14, CS18-30, CS32-43, VS01, VS05-13)*

Pre-treated MCM-41 (200 mg), suspended in 2.0 ml of Toluene dry, was reacted with 3-(chloropropyl)triethoxysilane (1 ml) for 5 up to 30 minutes in a sealed 2.0-5.0 ml vial equipped with a stirring bar of a MW-oven. The temperature was fixed at 110°C, 130°C, 150 °C or 170°C and it was continuously controlled by an external IR controller. At the end of the reaction the system was cooled until room temperature. The solid was filtered, washed three times with THF and extracted for 2 hours in CH<sub>2</sub>Cl<sub>2</sub>/Et<sub>2</sub>O mixture using a Soxhlet extractor, then dried under vacuum and stored overnight at 70°C. The functionalized mesoporous material obtained was stored under dried conditions.

### *Functionalization of MCM-41 using classical heating (Path B, CS05, CS31, CS44-49, VS02-03, VS14)*

Pre-treated MCM-41 (200 mg) suspended in 2.0 ml of Toluene dry was reacted with 3-(chloropropyl)triethoxysilane (1 ml) for 3 hours up overnight in a two-neck round-bottom flask equipped with a stirring bar and a condenser, at the reflux temperature of the solvent. At the end of the reaction the system was cooled until room temperature. The solid was filtered, washed three times with THF and extracted for 2 hours in CH<sub>2</sub>Cl<sub>2</sub>/Et<sub>2</sub>O mixture using a Soxhlet extractor, then dried under vacuum and stored overnight at 70°C. The functionalized mesoporous material obtained was stored under dried conditions.

***Functionalization MW-assisted- solvent free conditions of MCM-41 (Path C, CS10-12, VS04, VS15)***

Pre-treated MCM-41 (200 mg) was reacted with 3-(chloropropyl)triethoxysilane (1 ml) for 5 up to 30 minutes in a sealed 2.0-5.0 ml vial equipped with a stirring bar of a MW-oven. The temperature was fixed at 110°C, 130°C, 150 °C or 170°C and it was continuously controlled by an external IR controller. At the end of the reaction the system was cooled until room temperature. The solid was filtered, washed three times with THF and extracted for 2 hours in CH<sub>2</sub>Cl<sub>2</sub>/Et<sub>2</sub>O mixture using a Soxhlet extractor, then dried under vacuum and stored overnight at 70°C. The functionalized mesoporous material obtained was stored under dried conditions.

***Functionalization of MCM-41 in sealed oil bath (CS15-17)***

Pre-treated MCM-41 (200 mg), suspended in 2.0 ml of Toluene dry, was reacted with 3-(chloropropyl)triethoxysilane (1 ml) for in a sealed 2.0-5.0 ml vial equipped with a screw cap and an internal fiber optic as temperature control, under high stirring (400 r.p.m.) in an oil bath warmed at the fixed temperature of 145°C. The internal temperature of 130°C was reached in 2 minutes and the mixture was allowed to react at this temperature for 10 min. At the end of the reaction the system was cooled until room temperature. The solid was filtered, washed three times with THF and extracted for 2 hours in CH<sub>2</sub>Cl<sub>2</sub>/Et<sub>2</sub>O mixture using a Soxhlet extractor, then dried under vacuum and stored overnight at 70°C. The functionalized mesoporous material obtained was stored under dried conditions.

### TOC accuracy

TOC accuracy measurement was performed on two different silica samples (CS42, CS43) characterized by two different loadings near to the average loading.

Ten measures were performed on each sample in order to assess the uncertainty related to repeatability.

The expanded uncertainty  $U_e$  was calculated by the following equation:

$$U_e = k_p \cdot \hat{U}_c(y) \cdot y$$

Where

$k_p$  is the coverage factor, calculated on the basis of the desired level of confidence (95%) and the effective freedom degrees number ( $v_{eff}$ ) for each uncertainty contribution.  $K_p$  were calculated according to the Table DT-0002 of the ACCREDIA guide

$\hat{U}_c$  is the combined uncertainty related, composed by the contribution of the uncertainty related to the repeatability, the uncertainty related to the instrument calibration and the uncertainty related to weighing

$y$  is the measure

The TOC accuracy determined was 30%.

## Calibration set table

**Table 1.** TOC values (mmol C/gr of catalyst) of mesoporous silica samples, used for calibration, functionalized by a MW-assisted-Toluene method (A), a classical method (B) and a MW-assisted-s.f.c. method (C) at different times.

| Sample name | HCl silica treatment | Procedure       | Solvent     | Temperature (°C) | Time (min) | TOC (mmolC/gr of silica) | SD   |
|-------------|----------------------|-----------------|-------------|------------------|------------|--------------------------|------|
| CS01        | 25%                  | MW              | dry toluene | 150              | 5          | 0,89                     | 0,10 |
| CS02        | 25%                  | MW              | dry toluene | 150              | 10         | 1,03                     | 0,24 |
| CS03        | 25%                  | MW              | dry toluene | 150              | 15         | 0,93                     | 0,25 |
| CS04        | 25%                  | MW              | dry toluene | 150              | 30         | 1,01                     | 0,16 |
| CS05        | 25%                  | reflux          | dry toluene | 150              | 180        | 0,70                     | 0,19 |
| CS06        | 25%                  | MW              | dry toluene | 110              | 10         | 1,21                     | 0,08 |
| CS07        | 25%                  | MW              | dry toluene | 130              | 10         | 1,52                     | 0,14 |
| CS08        | 25%                  | MW              | dry toluene | 150              | 10         | 2,19                     | 0,24 |
| CS09        | 25%                  | MW              | dry toluene | 170              | 10         | 2,53                     | 0,07 |
| CS10        | 25%                  | MW              | -           | 130              | 10         | 2,19                     | 0,01 |
| CS11        | 25%                  | MW              | -           | 150              | 10         | 2,38                     | 0,14 |
| CS12        | 25%                  | MW              | -           | 170              | 10         | 2,79                     | 0,10 |
| CS13        | 25%                  | MW              | dry toluene | 130              | 10         | 0,69                     | 0,13 |
| CS14        | 25%                  | MW              | dry toluene | 130              | 10         | 0,81                     | 0,03 |
| CS15        | 25%                  | Sailed oil bath | dry toluene | 130              | 10         | 0,58                     | 0,07 |
| CS16        | 25%                  | Sailed oil bath | dry toluene | 130              | 10         | 0,71                     | 0,05 |
| CS17        | 25%                  | Sailed oil bath | dry toluene | 130              | 10         | 0,54                     | 0,02 |
| CS18        | 25%                  | MW              | dry toluene | 130              | 10         | 0,85                     | 0,10 |
| CS19        | 25%                  | MW              | dry toluene | 130              | 10         | 1,25                     | 0,13 |
| CS20        | 25%                  | MW              | dry toluene | 130              | 10         | 1,94                     | 0,18 |
| CS21        | 25%                  | MW              | dry toluene | 130              | 10         | 1,13                     | 0,36 |
| CS22        | 25%                  | MW              | dry toluene | 130              | 10         | 1,40                     | 0,46 |
| CS23        | 25%                  | MW              | dry toluene | 130              | 10         | 1,73                     | 0,12 |
| CS24        | 25%                  | MW              | dry toluene | 130              | 10         | 1,94                     | 0,05 |
| CS25        | 25%                  | MW              | dry toluene | 130              | 10         | 2,04                     | 0,14 |
| CS26        | 25%                  | MW              | dry toluene | 130              | 10         | 2,08                     | 0,10 |
| CS27        | 25%                  | MW              | dry toluene | 130              | 10         | 2,03                     | 0,15 |
| CS28        | 25%                  | MW              | dry toluene | 130              | 10         | 2,24                     | 0,03 |
| CS29        | 25%                  | MW              | dry toluene | 130              | 10         | 2,11                     | 0,14 |
| CS30        | 25%                  | MW              | dry toluene | 130              | 10         | 2,07                     | 0,04 |
| CS31        | 25%                  | reflux          | dry toluene | 130              | 10         | 2,34                     | 0,01 |
| CS32        | 5%                   | MW              | dry toluene | 150              | 15         | 2,46                     | 0,01 |
| CS33        | 15%                  | MW              | dry toluene | 150              | 15         | 2,09                     | 0,02 |
| CS34        | 25%                  | MW              | dry toluene | 150              | 15         | 1,92                     | 0,04 |
| CS35        | 5%                   | MW              | dry toluene | 165              | 15         | 2,26                     | 0,02 |
| CS36        | 15%                  | MW              | dry toluene | 165              | 15         | 1,10                     | 0,01 |
| CS37        | 25%                  | MW              | dry toluene | 165              | 15         | 2,05                     | 0,01 |
| CS38        | 5%                   | MW              | dry toluene | 130              | 10         | 1,44                     | 0,01 |
| CS39        | 15%                  | MW              | dry toluene | 130              | 10         | 1,60                     | 0,01 |
| CS40        | 25%                  | MW              | dry toluene | 130              | 10         | 1,72                     | 0,02 |

|      |     |        |             |       |            |      |      |
|------|-----|--------|-------------|-------|------------|------|------|
| CS41 | 5%  | MW     | dry toluene | 110   | 10         | 0,93 | 0,02 |
| CS42 | 15% | MW     | dry toluene | 110   | 10         | 1,17 | 0,00 |
| CS43 | 25% | MW     | dry toluene | 110   | 10         | 0,81 | 0,01 |
| CS44 | 5%  | reflux | dry toluene | 150   | 240        | 1,74 | 0,31 |
| CS45 | 15% | reflux | dry toluene | 150   | 240        | 2,49 | 0,01 |
| CS46 | 25% | reflux | dry toluene | 150   | 240        | 0,90 | 0,03 |
| CS47 | 5%  | reflux | dry toluene | 150   | over night | 2,16 | 0,01 |
| CS48 | 15% | reflux | dry toluene | 150   | over night | 2,76 | 0,03 |
| CS49 | 25% | reflux | dry toluene | 150   | over night | 2,15 | 0,02 |
| CS50 | 25% | MW     | -           | 130°C | 10         | 1,55 | 0,07 |
| CS51 | 25% | MW     | -           | 130°C | 10         | 2,95 | 0,03 |
| CS52 | 25% | MW     | -           | 130°C | 10         | 2,30 | 0,05 |
| CS53 | 25% | MW     | -           | 130°C | 10         | 2,92 | 0,08 |



## Validation set table

**Table 2.** TOC values (mmol C/gr of catalyst) of mesoporous silica samples, used for validation, functionalized by a MW-assisted-Toluene method (A), a classical method (B) and a MW-assisted-s.f.c. method (C) at different times.

| Sample name | HCl silica treatment | Procedure | Solvent     | Temperature (°C) | Time (min) | TOC (mmolC/gr of silica) | SD   |
|-------------|----------------------|-----------|-------------|------------------|------------|--------------------------|------|
| VS01        | 25%                  | MW        | dry toluene | 150              | 15         | 0,93                     | 0,25 |
| VS02        | 25%                  | reflux    | dry toluene | 150              | 180        | 0,70                     | 0,19 |
| VS03        | 25%                  | reflux    | dry toluene | 150              | 360        | 1,03                     | 0,14 |
| VS04        | 25%                  | MW        | -           | 110              | 10         | 1,97                     | 0,16 |
| VS05        | 25%                  | MW        | dry toluene | 130              | 10         | 1,25                     | 0,13 |
| VS06        | 25%                  | MW        | dry toluene | 130              | 10         | 2,01                     | 0,16 |
| VS07        | 25%                  | MW        | dry toluene | 130              | 10         | 1,94                     | 0,05 |
| VS08        | 25%                  | MW        | dry toluene | 130              | 10         | 2,24                     | 0,03 |
| VS09        | 25%                  | MW        | dry toluene | 130              | 10         | 2,05                     | 0,17 |
| VS10        | 25%                  | MW        | dry toluene | 130              | 10         | 2,13                     | 0,20 |
| VS11        | 25%                  | MW        | dry toluene | 130              | 10         | 2,33                     | 0,02 |
| VS12        | 5%                   | MW        | dry toluene | 110              | 10         | 0,93                     | 0,02 |
| VS13        | 25%                  | MW        | dry toluene | 110              | 10         | 0,81                     | 0,01 |
| VS14        | 15%                  | reflux    | dry toluene | 150              | 240        | 2,49                     | 0,01 |
| VS15        | 25%                  | MW        | -           | 130°C            | 10         | 1,43                     | 0,18 |
